1 **The Genetic Architecture of Leaf Stable Carbon Isotope Composition in *Zea mays* and the**  
2 **Effect of Transpiration Efficiency on Elemental Accumulation**

3

4 Crystal A. Sorgini<sup>\*</sup>, Lucas M. Roberts<sup>\*</sup>, Asaph B. Cousins<sup>†</sup>, Ivan Baxter<sup>‡</sup>, Anthony J. Studer<sup>\*,§</sup>

5

6 **Affiliation:**

7 <sup>\*</sup> Department of Crop Sciences, University of Illinois, Urbana, IL 61801, USA

8 <sup>†</sup> School of Biological Sciences, Washington State University, Pullman, Washington 99164, USA

9 <sup>‡</sup> Donald Danforth Plant Science Center, St. Louis, MO 63132, USA

10 <sup>§</sup> Corresponding Author

11 **Running Title:**

12 Genetic control of maize leaf  $\delta^{13}\text{C}$

13

14 **Key Words:**

15 *Zea mays*, carbon isotopes, transpiration efficiency, specific leaf area, ionomics

16

17 **Article Summary:**

18 Quantitative genetics approaches were used to investigate the genetic architecture of leaf stable  
19 carbon isotope discrimination ( $\delta^{13}\text{C}$ ) in maize. Developing a better understanding of leaf  $\delta^{13}\text{C}$   
20 could facilitate its use in breeding for reduced transpirational water loss. Several genomic  
21 regions were identified that contribute to the variation observed in leaf  $\delta^{13}\text{C}$ . Furthermore,  
22 contrary to what has been observed in other species, leaf  $\delta^{13}\text{C}$  was not correlated with specific  
23 leaf area. Finally, a leaf ionomic analysis indicates that a reduction in transpiration, and thus  
24 mass flow, would not result in a decrease in nutrient accumulation.

25

26 **Corresponding Author:**

27 Anthony J. Studer

28 Department of Crop Sciences, University of Illinois

29 1201 West Gregory Drive, Edward R. Madigan Laboratory, #289

30 Urbana, IL 61801 USA

31 217-244-5469, [astuder@illinois.edu](mailto:astuder@illinois.edu)

## 32 **ABSTRACT**

33 With increased demand on freshwater resources for agriculture, it is imperative that more water-  
34 use efficient crops are developed. Leaf stable carbon isotope composition,  $\delta^{13}\text{C}$ , is a proxy for  
35 transpiration efficiency and a possible tool for breeders, but the underlying mechanisms effecting  
36  $\delta^{13}\text{C}$  in  $\text{C}_4$  plants are not known. It has been suggested that differences in specific leaf area,  
37 which potentially reflects variation in internal  $\text{CO}_2$  diffusion, can impact leaf  $\delta^{13}\text{C}$ . However, at  
38 this point the relationship has not been tested in maize. Furthermore, although it is known that  
39 water movement is important for elemental uptake, it is not clear how manipulation of  
40 transpiration for increased water-use efficiency may impact nutrient accumulation. Here we  
41 characterize the underlying genetic architecture of leaf  $\delta^{13}\text{C}$  and test its relationship to specific  
42 leaf area and the ionome in four biparental populations of maize. Five significant QTL for leaf  
43  $\delta^{13}\text{C}$  were identified, including both novel QTL as well as some that were identified previously  
44 in maize kernels. One of the QTL regions contains an Erecta-like gene, the ortholog of which has  
45 been shown to regulate transpiration efficiency and leaf  $\delta^{13}\text{C}$  in *Arabidopsis*. Our data does not  
46 support a relationship between  $\delta^{13}\text{C}$  and specific leaf area, and of the 19 elements analyzed, only  
47 a weak correlation between molybdenum and  $\delta^{13}\text{C}$  was detected. Together these data begin to  
48 build a genetic understanding of leaf  $\delta^{13}\text{C}$  in maize and suggest the potential to improve plant  
49 water use without significantly influencing elemental homeostasis.

## 50 INTRODUCTION

51 The impacts of global population growth and climate change on natural resources indicate that  
52 the future of food security will depend on increasing both the productivity and sustainability of  
53 agriculture systems (National Academies of Sciences, Engineering, and Medicine, 2018).  
54 Improving crop water-use efficiency (WUE) would ameliorate the effects of the increasing  
55 frequency and severity of droughts (Scheffield and Wood 2008; Chapman *et al.* 2012, Leakey  
56 2019). Agronomic WUE can be defined as the amount of yield, whether grain or biomass,  
57 produced per the total amount of water utilized by the crop (Condon *et al.* 2004). Many factors  
58 can affect WUE including transpirational water loss through the stomatal pores on the leaf's  
59 surface. In C<sub>3</sub> plants the amount of carbon available for assimilation is limited by stomatal and  
60 mesophyll conductances to CO<sub>2</sub> (Flexas *et al.* 2016) and therefore correlated to the rate of  
61 transpiration. For example, yield was shown to be positively associated with cumulative  
62 transpiration in soybean (Purcel 2007), and higher net carbon assimilation was accompanied by  
63 higher transpiration in rice (Adachi *et al.* 2017). However, higher rates of biomass yield do not  
64 always correspond to higher transpiration rates in C<sub>4</sub> plants due to the evolution of the carbon  
65 concentrating mechanism. The uncoupling of CO<sub>2</sub> assimilation and transpiration has been  
66 demonstrated in field and greenhouse grown maize (Walker 1986, Kolbe *et al.* 2018a). Thus,  
67 there is the potential to increase transpiration efficiency, or carbon gain per amount of water  
68 transpired, without reducing productivity in C<sub>4</sub> species (Leakey, 2019). A large amount of  
69 variation is present in the transpiration rates of C<sub>4</sub> crop species, including sorghum (Hammer *et*  
70 *al.* 1997) and maize (Bunce 2010), suggesting that existing occurring alleles could be exploited  
71 for optimizing WUE.

72  
73 Although increasing transpiration efficiency provides a strategy to avoid the negative effects of  
74 water limitation on plant growth and development (Passioura 1996, Chaves *et al.* 2002, Jaleel *et*  
75 *al.* 2009), there is the possibility of pleiotropic side effects given the fundamental requirement  
76 for water movement in plants. A potential impact of reducing transpiration could be a  
77 corresponding reduction in the uptake and mobilization of water-soluble nutrients. As water is  
78 absorbed by roots, nutrients in solution come in contact with the root surface in a process known  
79 as mass flow (Barber *et al.* 1963). Most nutrients are acquired by mass flow, although  
80 phosphorus is a notable exception that contacts the root through diffusion (Barber *et al.* 1962).

81 Reducing transpiration may also affect nutrient uptake facilitated by symbiosis with mycorrhizal  
82 fungi (Marschner and Dell 1994). Therefore, the manipulation of basic plant processes such as  
83 transpiration for improved WUE must also consider potential impacts on the availability of  
84 essential plant nutrients. Previous research has shown in the C<sub>4</sub> plant sorghum that total leaf  
85 mineral content is positively correlated to transpiration efficiency (Masle *et al.* 1992). While  
86 meta-analyses of high CO<sub>2</sub> grown plants with reduced transpiration have shown a drastic  
87 reduction in nutrient accumulation in C<sub>3</sub> crops (McGrath and Lobell 2013), sorghum showed no  
88 difference and maize had similar levels of zinc, protein, and phytate, but a decrease in iron  
89 accumulation (Meyers *et al.* 2014). Although part of the reduction in nutrient content can be  
90 explained by dilution, due to increased growth at high CO<sub>2</sub>, this does not completely account for  
91 the observed reduction. An ionomics (high-throughput elemental profiling) approach has been  
92 used in maize to assess kernel nutrient content (Baxter *et al.* 2014). A similar ionomics approach  
93 in leaf tissue could be used to assess the effect of transpiration on nutrient uptake.

94

95 The difficulty and labor-intensive nature of accurately quantifying the amount of water that an  
96 individual plant transpires has been a major limitation to breeding for transpiration efficiency.  
97 This has resulted in the selection for drought tolerance rather than applying a direct selection for  
98 water use. One alternative method is the use of leaf stable carbon isotopes as a proxy for  
99 transpiration efficiency. The stable carbon isotope composition,  $\delta^{13}\text{C}$ , reflects the amount of <sup>13</sup>C  
100 present in plant tissue relative to a standard (Keeling 1979). Enzymes in the process of carbon  
101 fixation discriminate differently against the heavier <sup>13</sup>C atoms in a process known as  
102 fractionation (Farquhar *et al.* 1982, O’Leary 1988). It has been widely shown that stable carbon  
103 isotopes can be used as a proxy trait for quantifying a plant’s transpiration efficiency in C<sub>3</sub> plants  
104 (Farquhar *et al.* 1989a, Farquhar *et al.* 1989b, Condon *et al.* 1990, Virgona *et al.* 1990, Condon  
105 *et al.* 1993, Barbour *et al.* 2010) and in C<sub>4</sub> plants (Henderson *et al.* 1998, von Cammerer *et al.*  
106 2014, Ellsworth *et al.* 2017, Twohey III *et al.* 2019, Ellsworth *et al.* 2020). Studies have also  
107 shown that  $\delta^{13}\text{C}$  can be influenced by environmental factors including light intensity and drought  
108 (reviewed in Cernusak *et al.* 2013). However, the genetic control of  $\delta^{13}\text{C}$  remains unknown in C<sub>4</sub>  
109 species.

110

111 Kolbe *et al.* showed that  $\delta^{13}\text{C}$  did not correlate with any of the photosynthetic enzymes  
112 previously posited to control for  $\delta^{13}\text{C}$  variation (2018b). Additionally, a transcriptome analysis  
113 was unable to identify a clear candidate gene (Kolbe *et al.* 2018b). Quantitative genetic  
114 approaches have the potential to reveal the genetic control of  $\delta^{13}\text{C}$  in  $\text{C}_4$  species because genomic  
115 locations are tested for associations with the trait of interest, without *a priori* knowledge of the  
116 mechanism underlying the variation. Maize is ideal for use in mapping studies due to its high  
117 level of recombination and low linkage disequilibrium (Yu and Buckler 2006). Mapping  
118 methods have been successfully used for decades to identify genes controlling complex traits in  
119 maize, with evolving approaches to tackle more difficult traits (Wallace *et al.* 2014). In addition,  
120 maize is both a model organism with available populations and genomic data, and one of the  
121 three most important global crops contributing to 30% of the total calories consumed by humans  
122 (Shiferaw *et al.* 2011).

123

124 There have been several previous studies that used quantitative genetics to investigate  $\delta^{13}\text{C}$  in  $\text{C}_3$   
125 species (Teulat *et al.* 2002, Masle *et al.* 2005, Rebetzke *et al.* 2008, Xu *et al.* 2009). In  
126 *Arabidopsis* the gene *ERECTA* was identified in a QTL study for isotopic discrimination and was  
127 found to alter transpiration efficiency by altering stomatal density (Masle *et al.* 2005). Genetic  
128 mapping of leaf  $\delta^{13}\text{C}$  has also been performed in the  $\text{C}_4$  species *Setaria viridis* (Feldman *et al.*  
129 2018, Ellsworth *et al.* 2020) and kernel  $\delta^{13}\text{C}$  has been mapped in the  $\text{C}_4$  maize (Gresset *et al.*  
130 2014, Avramova *et al.* 2019). Although the QTL found for  $\text{C}_4$  species still require fine-mapping  
131 to identify the causative gene, no correlation was observed between kernel  $\delta^{13}\text{C}$  and leaf  $\delta^{13}\text{C}$   
132 (Foley 2012). The lack of correlation may be the result of post-photosynthetic fractionation  
133 (Badeck *et al.* 2005), and therefore mapping QTL for  $\delta^{13}\text{C}$  in leaves may reveal additional loci  
134 not found using kernels. In this manuscript, we focus on leaf  $\delta^{13}\text{C}$  in maize and its association  
135 with leaf elemental composition. We also investigate variation in specific leaf area (SLA) and its  
136 potential relationship to leaf  $\delta^{13}\text{C}$  by  $\text{CO}_2$  diffusion. Characterization of the genetic architecture  
137 of leaf  $\delta^{13}\text{C}$  will provide a better context for understanding what drives  $\delta^{13}\text{C}$ , which will allow  
138 breeders to utilize this trait in crop improvement.

## 139 **MATERIALS AND METHODS**

### 140 **Plant Material**

141 All experiments were planted at the University of Illinois Crop Sciences Research Farm, Urbana  
142 IL and were subject to natural conditions without supplemental irrigation. NAM RIL families  
143 CML103, CML333, NC358, and Tx303 and NAM founder parents (McMullen *et al.* 2009) are  
144 publicly available through the Maize Genetic Cooperative Stock Center. The NAM RIL families  
145 were planted in the summer of 2015 using an augmented incomplete block design. For this  
146 experiment fifteen kernels were planted in each 3.7 meter row with 0.8 meter spacing between  
147 rows and 0.9 meter alleys. The families were randomized together, with each block consisting of  
148 20 lines and 2 checks (B73 and one of the other founder lines). Of the 880 plots, 10% were  
149 dedicated to checks with the common parent B73 appearing in 40 plots and each of the four  
150 founder lines appears in ten plots. All lines used for the GWAS experiment are publicly available  
151 through the USDA Germplasm Resources Information Network (GRIN). This experiment was  
152 planted on May 23<sup>rd</sup> 2016. Twenty kernels were planted in each 3.7 meter row with 0.8 meter  
153 spacing between rows and 0.9 meter alleys, and then thinned to 15 plants per row. A complete  
154 list of lines used can be found in Tables S1-S3.

155

### 156 **Tissue Sampling**

157 Samples for  $\delta^{13}\text{C}$  analysis from the NAM RIL populations were collected six weeks after  
158 planting as follows. A rectangular piece of tissue approximately 7.5 cm X 5 cm was taken from  
159 the center of the leaf blade of the uppermost fully expanded leaf from four plants in each plot.  
160 Samples were placed in a coin envelope and dried at 65°C for at least 7 days. After drying four  
161 hole punches (each 0.058532 cm<sup>2</sup>) were taken and placed in a 6 mm x 4 mm tin capsules (OEA  
162 Laboratories # C11350.500P) for analysis using a Delta PlusXP (Washington State University)  
163 isotope ratio mass spectrometer. Leaf samples to measure specific leaf area (SLA) were collected  
164 from four plants in each of the plots (preferentially but not necessarily the same plants as were  
165 collected for  $\delta^{13}\text{C}$ ) using a 1.6 cm diameter cork borer. Leaf discs were dried at 65°C for at least  
166 7 days prior to weighing on an analytical balance (Model MS204S). Specific leaf area (SLA) was  
167 calculated as the area of a leaf disc divided by its dry weight. These same leaf discs were then  
168 used for ionomics analyses as described in Pauli *et al.* 2018. Leaf samples for  $\delta^{13}\text{C}$  analysis from  
169 the GWAS panel were collected from the uppermost fully expanded leaf seven weeks after

170 planting using the hole punch method and processed as described previously (Twohey III *et al.*  
171 2019). Due to the high level of diversity in this panel, some lines were flowering when samples  
172 were collected, which resulted in tissue being collected from the flag leaf. These samples were  
173 analyzed using a Costech instruments elemental combustion system and a Delta V Advantage  
174 isotope ratio mass spectrometer.

175

## 176 **Statistical Analysis**

177 All analyses were completed using custom scripts and statistical packages in R (R Core Team  
178 2017).

179

180 **Correlation analysis:** Pearson correlations using phenotype mean values were calculated with  
181 `corr.test()` in R package ‘psych’ (Revelle 2018) using complete observations and Holm’s method  
182 (Holm 1979) to adjust p-values for multiple testing. The correlation matrix was visualized using  
183 `pairs.panel()` in the R package ‘psych’ (Revelle 2018).

184

185 **Stepwise regression QTL mapping:** The analysis was completed using  
186 `NAM_phasedImputed_1cM_AllZeaGBSv2.3` dataset. The file contains fully imputed and phased  
187 genotypes for most of the RILs in the NAM population (Zhao *et al.* 2006; Lipka *et al.* 2015).  
188 This HapMap format file was converted to numeric format where 0 is the B73 homozygote  
189 reference, 1 is a heterozygote, and 2 is the homozygote alternative parent. Phenotypic means  
190 were regressed onto genotype. Lowest p-values from the ANOVA values of the linear model  
191 were recorded (i.e. `pvalues[i] = anova(lm(mypheno~geno[i,]))`). The previously identified marker  
192 was added to the model and re-run in a stepwise regression procedure. Significance thresholds  
193 were determined by 200 permutations and alpha was set at 0.05. All analysis was completed  
194 using custom scripts in R (R Core Team 2017). Results were then compared to composite  
195 interval QTL mapping completed in R package ‘r/QTL’ (Broman *et al.* 2003).

196

197 **Joint linkage mapping:** The analysis was completed using HapMapv2 (Chia *et al.* 2012). The  
198 genotypic dataset consisted of 836 markers were scored on 624 RILs from four biparental  
199 families with B73 as a common parent. The marker subset represented markers that could be  
200 placed unambiguously on the physical map. Unambiguous markers are defined by those



201 anchored in CDS positions of genes that have held consistent over genome versions verified by  
202 MaizeGDB cross reference tables. Missing data were imputed as previously described in Tain *et*  
203 *al.* (2011). Joint linkage models were constructed using custom script in R (R Core Team 2017)  
204 by a stepwise regression procedure. In general, we used linkage to test every marker across all  
205 four families to find the most significant QTL. The model has a family term and a marker:family  
206 term. The family term accounts for differences in mean phenotype between families. Inclusion of  
207 the marker:family term means that for each QTL we are assigning a separate effect to each  
208 family. The family term was included in the model and each of the 836 possible marker-by-  
209 family terms were assessed. Lowest p-values from the ANOVA values of the linear regression  
210 model were recorded (i.e.  $JL\_pvalues[i] = anova(lm(my\_pheno \sim family + geno[,i]:family))$ ). All  
211 836 marker-by-family terms were tested. SNP effects were nested in families to reflect the  
212 potential for unique QTL allele effects within each family. The lowest resulting *p*-value was  
213 recorded for each permutation. Significance thresholds were determined using 1000  
214 permutations for each family independently and alpha was set at 0.05.

215

216 **Genome wide association study:** A subset of 413 of 503 diverse lines from Hirsch *et. al* 2014  
217 that included the Wisconsin Diversity Set of Hansey *et al* 2011 was grown in 2016 and listed in  
218 Table S2. Hirsch *et. al* 2014 collected RNA from whole seedling tissue which was sequenced via  
219 IlluminaHiSeq and filtered to create a working set of 485,179 SNPs that is available at  
220 <https://datadryad.org/resource/doi:10.5061/dryad.r73c5>. The 413 lines were grown in 2016 and  
221 tissue was sampled when B73 was at the developmental stage V10. Isotopic analysis is described  
222 above. A genome wide association analysis was run using R package ‘GAPIT’ (Lipka *et al.*  
223 2012) on leaf  $\delta^{13}C$ . Removal of SNPs with a minor allele frequency of less than 0.05 resulted in  
224 a subset of 438,222 SNPs being used in this analysis. A MLM model was used with model  
225 selection set to true to find the optimum number of principal components to account for  
226 population structure (Lipka *et. al* 2012). Significance threshold were calculated using the  
227 Bonferroni correction of familywise error rate. An alternative significance test was calculated  
228 using the Benjamini-Hochberg procedure for controlling the false discovery rate (Benjamini &  
229 Hochberg 1995).

230

231

## 232 **Data Availability**

233 Genotypic datasets were downloaded from Panzea CyVerse iPlant Data Storage Commons  
234 (<http://datacommons.cyverse.org/browse/iplant/home/shared/panzea>). All phenotypic datasets  
235 were quality controlled for complete technical replicates, outliers, and availability of genotypic  
236 data. A list of all genotypes used in each analysis is provided in Tables S1-S4 and have been  
237 uploaded to figshare. Briefly, the  $\delta^{13}\text{C}$  analysis was completed with 640 RILs; including 156  
238 CML103 RILs, 160 CML333 RILs, 159 NC358 RILs, and 165 Tx303 RILs (Table S1). The  
239 element analysis was completed using a total of 704 RILs; including 175 CML103 RILs, 181  
240 CML333 RILs, 175 NC358 RILs, and 173 Tx303 RILs (Table S1). The SLA analysis used a  
241 total of 683 RILs; including 172 CML103 RILs, 176 CML333 RILs, 168 NC358 RILs, and 167  
242 Tx303 RILs (Table S1). The Joint linkage analysis was completed using a total of 624 RILs;  
243 including 154 CML103 RILs, 159 CML333 RILs, 151 NC358 RILs, and 160 Tx303 RILs (Table  
244 S2). Table S3 lists the 413 lines used in the GWAS of leaf  $\delta^{13}\text{C}$ . Table S4 includes the QTL  
245 coordinates identified in the elemental QTL analyses. Figure S1 shows the distribution of leaf  
246  $\delta^{13}\text{C}$  for each of the NAM RIL families. Figure S2 presents the correlation matrix for the  
247 elemental analysis, and Figure S3 shows the chromosomes where significant QTL were  
248 identified for each element. Figure S4 is the LOD plot from the GWAS mapping of leaf  $\delta^{13}\text{C}$ .

249

## 250 **RESULTS**

### 251 **Single family QTL mapping**

252 Previous studies investigating leaf  $\delta^{13}\text{C}$  in maize indicated that the NAM founder lines CML103,  
253 CML333, and Tx303 consistently contrast B73 with respect to leaf  $\delta^{13}\text{C}$  (Kolbe *et al.* 2018b;  
254 Twohey III *et al.* 2019). The founder line NC358 had a moderate leaf  $\delta^{13}\text{C}$  value (Kolbe *et al.*  
255 2018b; Twohey III *et al.* 2019) and was also included in this study. The RIL families generated  
256 from these four founder lines were grown for linkage analysis. Consistent with previous studies,  
257 both the CML103 and CML333 parent lines had a significantly less negative leaf  $\delta^{13}\text{C}$  than B73  
258 ( $p < 0.05$ ), when grown as replicated controls among the RILs. However, the Tx303 and NC358  
259 parental lines were not found to be significantly different from B73. Transgressive segregation  
260 was observed in all four RIL families (Fig. S1).

261

262 Stepwise regression analyses found significant QTL for leaf  $\delta^{13}\text{C}$  in the NAM RIL families  
263 CML103, CML333, and Tx303 but not in NC358 (Fig. 1A). Interestingly, none of these QTL  
264 were shared between RIL families in this analysis. The CML103 RIL family had two significant  
265 QTL, one on chromosome 5 at 211.7 Mb and another on chromosome 7 at 142.4 Mb. Combined  
266 these two QTL accounted for 21.36% of the total phenotypic variance (Table 1). The RIL family  
267 CML333 had one significant QTL on chromosome 3 at 183.9 Mb, which accounted for 8.37% of  
268 the total phenotypic variation explained (Table 1). Finally, the Tx303 RIL family had a  
269 significant QTL on chromosome 2 at 13.5 Mb explaining 9.48% of phenotypic variation (Table  
270 1). No significant QTL for leaf  $\delta^{13}\text{C}$  were identified in the NC358 RIL family.

271

272 Specific leaf area was used as a proxy trait to test for a relationship between leaf thickness and  
273 leaf  $\delta^{13}\text{C}$ . No significant correlation was observed between SLA and leaf  $\delta^{13}\text{C}$  ( $p = 0.304$ ). In  
274 addition to testing for a correlation with leaf  $\delta^{13}\text{C}$ , QTL mapping was performed for SLA to  
275 identify any possible overlaps with genomic regions identified for leaf  $\delta^{13}\text{C}$ . Mapping of SLA in  
276 the four RIL families identified two significant QTL. In the CML103 RIL family, a QTL was  
277 identified on chromosome 5 at 86.1 Mb and in the Tx303 RIL family a QTL on chromosome 9 at  
278 107.8 Mb. Neither of the SLA QTL identified overlapped with QTL for leaf  $\delta^{13}\text{C}$  (Fig. 1B).

279

280 To test a potential link between transpiration and nutrient uptake, an elemental analysis was  
281 performed on leaf samples from each of the four RIL families. Samples were analyzed for 19  
282 different elements using an IPC-MS. A full correlation matrix shows that some elements are  
283 highly correlated with each other (Fig. S2), but no strong correlations ( $r > +/- 0.7$ ) were  
284 identified with  $\delta^{13}\text{C}$ . However, there was a weak but significant correlation ( $p = 6.745\text{E-}05$ ,  $r =$   
285 0.18) between leaf  $\delta^{13}\text{C}$  and Mo (Fig. 2). Subsequent QTL mapping of the 19 element  
286 concentrations identified 28 QTL across 12 different elements (Fig. 3, Fig. S3). Significant QTL  
287 were found for B, Mg, P, S, K, Fe, Mn, Co, Cu, Rb, Sr, and Mo (Table S4). None of the  
288 elemental QTL overlapped with those found for leaf  $\delta^{13}\text{C}$  or SLA. However, in some cases  
289 multiple elements had common QTL, such as Mg and Mn on chromosome 10 in the CML103  
290 RIL family and Co and Cu on chromosome 3 in the NC358 RIL family. Additionally, common  
291 QTL for an element were found across families, as in the case of Mg in the NC358 and Tx303  
292 RIL families.

293

### 294 **Joint linkage QTL mapping**

295 A joint linkage analysis was performed for leaf  $\delta^{13}\text{C}$  to test whether any additional QTL would  
296 be identified by combining the four RIL families into a single analysis. The joint linkage analysis  
297 identified the same significant QTL for leaf  $\delta^{13}\text{C}$  on chromosomes 2, 3, and 5 (Table 2) as in the  
298 single family stepwise regression analysis. Although the QTL on chromosome 7 was not found  
299 using the joint linkage approach, an additional significant QTL was identified on chromosome 1.  
300 Given that no significant QTL for leaf  $\delta^{13}\text{C}$  were identified in the NC358 RIL family, we tested  
301 whether removing this family from the joint linkage analysis would change the outcome. When  
302 the joint linkage analysis was rerun excluding family NC358, the same four QTL were  
303 reidentified with decreased  $p$ -values, and the total phenotypic variation explained ( $R^2$  value)  
304 increased in later steps of the model. However, no new QTL were identified with this approach.

305

### 306 **Genome wide association study**

307 Once significant QTL intervals were identified for leaf  $\delta^{13}\text{C}$  using a biparental mapping strategy  
308 (Fig. 1), we performed a genome wide association study to try and narrow down the intervals to  
309 specific genic regions. The Wisconsin Diversity Panel was chosen because it represents a large  
310 portion of variation found within maize and has a robust publicly available 485,179 SNP set. A  
311 subset of 413 of the possible lines were chosen due to seed availability, and were grown in a  
312 single randomized block. No significant SNP associations with leaf  $\delta^{13}\text{C}$  were identified (Fig.  
313 S4).

314

## 315 **DISCUSSION**

316 Leaf  $\delta^{13}\text{C}$  has a moderately high heritability in maize (Twohey III *et al.* 2019), which facilitates  
317 the use of quantitative genetics approaches to pinpoint the genomic locations controlling this  
318 trait. Here we characterized the genetic control of  $\delta^{13}\text{C}$  in maize using leaf tissue collected at  
319 vegetative stage V9-V10 to reflect the photosynthetic pool during active growth. We were able  
320 to identify several significant QTL for leaf  $\delta^{13}\text{C}$  across three NAM RIL families using stepwise  
321 regression. Using these populations we were also successful in identifying QTL for SLA and 12

322 different elements. Contrary to our hypothesis, no significant correlation was observed between  
323 leaf  $\delta^{13}\text{C}$  and SLA or elemental composition.

324

325 We strategically picked NAM RIL families based on the founder parents that had the largest  
326 differences in their  $\delta^{13}\text{C}$  for single family and joint linkage analyses. However, we also included  
327 a parent which was not extremely different from B73. Interestingly, we were unable to identify  
328 significant QTL in the NC358 RIL family despite transgressive segregation. We interpret this  
329 result as an indication the NC358 contains only small effect QTL that were not detected in this  
330 study. Alternatively, NC358 leaf  $\delta^{13}\text{C}$  may be more sensitive to the growing environment with a  
331 smaller genetic component. Twohey III *et al.* noted that while several maize lines were stable  
332 when tested in greenhouse and field environments, there were other lines that had highly variable  
333 isotopic signatures (2019). A large amount of environmental influence over this trait in some  
334 backgrounds would obscure the genetic contribution and our ability to detect significant QTL.

335

336 When we compared the regions identified here with regions previously mapped in *S. viridis* no  
337 obvious overlap was observed (Ellsworth *et al.*, 2020). However, of the QTL identified for  
338 kernel  $\delta^{13}\text{C}$  in maize (Gresset *et al.* 2014, Avramova *et al.* 2019), our QTL for leaf  $\delta^{13}\text{C}$   
339 overlapped those on chromosomes 1, 3, and 7. This result demonstrates that some QTL for  $\delta^{13}\text{C}$   
340 are shared between tissues, and that these QTL are identified across several populations and  
341 environments. Therefore, while metabolic processes have the possibility of influencing the  $\delta^{13}\text{C}$   
342 as products are mobilized from source to sink tissues, our data would suggest that the initial  
343 source signature is maintained to a large degree in the kernel.

344

345 Although the QTL analyses presented here do not provide gene-level resolution, we were able to  
346 look for candidate genes within the intervals. The chromosome 5 QTL includes an Erecta-like  
347 gene (*er1*, GRMZM2G463904, 211.8 Mb). Unfortunately, stomatal density data were not  
348 collected on these populations, which would further support the role of *er1* in variation of leaf  
349  $\delta^{13}\text{C}$ . This would be an interesting area of future research given that this gene was found to effect  
350  $\delta^{13}\text{C}$  in Arabidopsis by changing stomatal density (Masle *et al.* 2005). We also looked for genes  
351 that have been previously shown to directly influence transpiration efficiency in maize (reviewed  
352 in Leakey 2019). However, none of these were found to be located in our QTL intervals.

353

354 The linkage analyses using biparental mapping populations identified several significant QTL,  
355 but none of the single family QTL were independently identified in more than one family (Fig.  
356 1). This result indicates that leaf  $\delta^{13}\text{C}$  can be controlled by different factors depending on the  
357 genetic background. Furthermore, if in fact leaf  $\delta^{13}\text{C}$  is controlled by many small effect QTL,  
358 this may explain why the GWAS did not identify any significant SNP associations with leaf  
359  $\delta^{13}\text{C}$ . Identifying rare alleles with small to moderate effect size is a known weakness of the  
360 GWAS method (Bazakos *et al.* 2017). A better understanding of the mechanisms influencing leaf  
361  $\delta^{13}\text{C}$  would allow future analyses to move beyond single marker tests and instead look at SNPs  
362 in genes representing a particular pathway or process that could be collectively significant. This  
363 approach was successfully used to study maize lipid biosynthesis (Li *et al.* 2019).

364

365 The diffusion of  $\text{CO}_2$  into mesophyll cells is a potential source of variation in leaf  $\delta^{13}\text{C}$ , which  
366 could be linked to stomatal density or leaf thickness. Previous work in maize has shown that  
367 stomatal density is not correlated with leaf  $\delta^{13}\text{C}$  in a small diversity panel of maize (Foley 2012).  
368 SLA has not been linked to  $\delta^{13}\text{C}$  in maize, but in rice  $\delta^{13}\text{C}$  and SLA have shared QTL (This *et al.*  
369 2010). In this study we were able to test SLA and  $\delta^{13}\text{C}$  in four RIL families, and no correlation  
370 was observed. Likewise, a comparison of the QTL analyses showed no overlapping regions for  
371 SLA and those mapped for leaf  $\delta^{13}\text{C}$ . This result suggests two possibilities. First, it is possible  
372 that differences in SLA observed in these populations are not due to leaf thickness, but rather  
373 composition. Identifying the causative genes underlying the QTL would give insight into the  
374 mechanism. A second possibility is that leaf anatomical traits other than leaf thickness influence  
375 leaf  $\delta^{13}\text{C}$ . A variety of anatomical traits could affect  $\delta^{13}\text{C}$  and would not be captured by  
376 measurement of SLA.

377

378 With our data we were able to indirectly test the relationship between nutrient uptake and  
379 transpiration. If reducing transpiration limits nutrient uptake, transpiration efficiency as a trait for  
380 increasing WUE would have limited application. The nineteen elements tested here were  
381 previously reported to have narrow-sense heritabilities ranging from 0.11 to 0.66 (Baxter 2014).  
382 The only element found to be significantly correlated to leaf  $\delta^{13}\text{C}$  was Molybdenum.  
383 Molybdenum is required for several vital biological processes related to nitrogen and water



384 (Baxter 2008). Because molybdenum is a required cofactor for ABA synthesis, maize plants  
385 overexpressing molybdenum cofactor sulfurase gene have increased drought tolerance (Lu *et al.*  
386 2013). However, in our study we observed a positive correlation between leaf  $\delta^{13}\text{C}$  and  
387 molybdenum, which is contrary to expectation given that an increase in  $\delta^{13}\text{C}$  signifies a decrease  
388 in WUE. Overall, it is encouraging that the majority of elements sampled were not associated  
389 with  $\delta^{13}\text{C}$ . This suggests that breeding for leaf  $\delta^{13}\text{C}$  as a means to reduce transpiration would be  
390 unlikely to result in plants with nutrient uptake deficiencies.

391  
392 Although the main focus of this study was to investigate leaf  $\delta^{13}\text{C}$  and its relationship to SLA  
393 and nutrient accumulation, the QTL mapping of the analyzed elements was an interesting  
394 biproduct. Mapping the leaf ionome of the four RIL families resulted in many significant QTL,  
395 including some overlapping intervals for different elements. Multi element QTLs are common,  
396 and are thought to be due to loci affecting processes such as the acidification of the rhizosphere  
397 or altering the permeability of the casparian strip (Baxter 2015). Interestingly there was not much  
398 overlap between the ionic QTL identified here and a previous study on kernels (Table 4  
399 Baxter *et al.* 2014). The only overlapping QTL was for Rb85 on chromosome 3. There are  
400 several possible causes for the limited overlap between these methods. The ionome is strongly  
401 influenced by genotype by environment interactions, with many of the QTL identified in  
402 previous studies being location specific (Asaro *et al.* 2016). Additionally, there could be  
403 differences between the leaf and grain ionome is due to differential mobilization of nutrients  
404 from vegetative tissues into kernels during grain fill.

405

## 406 **Acknowledgements**

407 We thank Aaron Slack, Robert Twohey III, and Mengqiao Han for technical assistance with  
408 growing and sampling the mapping populations. This work was supported by United States  
409 Department of Agriculture - Hatch, a United States Department of Agriculture - Agriculture and  
410 Food Research Initiative grant (2019-67013-29195), the United States Department of Agriculture  
411 - Agricultural Research Service (5070-21000-039-00D), as well as a Department of Energy,  
412 Office of Science, Office of Biological and Environmental Research grant (DE-SC0018277).

413 **Tables**

414

**Table 1:  $\delta^{13}\text{C}$  Single Family Stepwise Regression QTL**

| Step | Marker | Family | Chr. | Position<br>(Mb) | <i>p</i> -value | TPVE*<br>(%) | Effect<br>Size | 1LOD Interval<br>(Mb) |
|------|--------|--------|------|------------------|-----------------|--------------|----------------|-----------------------|
| 1    | 824    | CML103 | 5    | 211.7            | 7.03E-06        | 12.32        | 0.1286         | 211.5 - 212.9         |
| 2    | 1032   | CML103 | 7    | 142.4            | 7.52E-05        | 21.36        | -0.1064        | 141.2 - 149.7         |
| 1    | 470    | CML333 | 3    | 183.9            | 2.07E-04        | 8.37         | 0.1137         | 178.6 - 195.7         |
| 1    | 251    | Tx303  | 2    | 13.5             | 6.04E-05        | 9.48         | -0.1457        | 13.5 - 15.2           |

\* Total Percent of Variation Explained

415

416

417 **Table 2:  $\delta^{13}\text{C}$  Joint Linkage Mapping QTL**

| All Four Families |       |        |      |                  |                 |              |                |                       |
|-------------------|-------|--------|------|------------------|-----------------|--------------|----------------|-----------------------|
| Step              | QTL   | Family | Chr. | Position<br>(Mb) | <i>p</i> -value | TPVE*<br>(%) | Effect<br>Size | 1LOD Interval<br>(Mb) |
| 1                 | m0200 | Tx303  | 2    | 13.8             | 2.82E-06        | 7.9          | -0.144         | 12.6 - 15.8           |
| 2                 | m0677 | CML103 | 5    | 211.2            | 1.98E-04        | 11.8         | 0.123          | 211.2 - 212.7         |
| 3                 | m0385 | CML103 | 3    | 182.1            | 1.44E-04        | 15.24        | 0.115          | 180.0 - 195.3         |
| 4                 | m0132 | Tx303  | 1    | 263.2            | 4.41E-05        | 18.19        | -0.126         | 257.1 - 263.6         |
| Excluding NC358   |       |        |      |                  |                 |              |                |                       |
| Step              | QTL   | Family | Chr. | Position<br>(Mb) | <i>p</i> -value | TPVE*<br>(%) | Effect<br>Size | 1LOD Interval<br>(Mb) |
| 1                 | m0200 | Tx303  | 2    | 13.8             | 5.70E-06        | 7.47         | -0.144         | 12.6 - 15.9           |
| 2                 | m0677 | CML103 | 5    | 211.2            | 2.86E-04        | 12.31        | 0.123          | 211.2 - 212.7         |
| 3                 | m0385 | CML103 | 3    | 182.1            | 1.60E-04        | 16.45        | 0.115          | 180.0 - 195.3         |
| 4                 | m0132 | Tx303  | 1    | 263.2            | 5.97E-05        | 20.05        | -0.121         | 253.0 - 263.6         |

418



## 419 **Figure Captions**

420 **Figure 1  $\delta^{13}\text{C}$  and SLA Single Family Stepwise Regression QTL Mapping.**  $\delta^{13}\text{C}$  QTL (A)  
421 were identified in NAM RIL families CML103 (black), CML333 (orange), and Tx303 (grey) but  
422 not in NC358 (blue). Specific leaf area (SLA) QTL (B) were identified in NAM RIL families  
423 CML103 (black) and Tx303 (grey). Significance thresholds (dashed horizontal line) were  
424 determined by 200 permutations and an alpha of 0.05.

425

426 **Figure 2 Pearson's  $r$  Correlations.** Correlations of mean phenotypic values using complete  
427 observations and Holm's method to adjust  $p$ -values for multiple testing. The heat map shows no  
428 strong correlations between  $\delta^{13}\text{C}$  mean values and element mean values.  $\delta^{13}\text{C}$  and Mo have a  
429 significant  $p$ -value ( $p = 6.745\text{E-}05$ ,  $r = 0.18$ ).

430

431 **Figure 3 Element Single Family Stepwise Regression QTL Mapping.** QTL mapping  
432 identified 28 QTL across 12 different elements. Significant QTL ( $\alpha = 0.05$ ) for each element  
433 are plotted. QTL location is shown across the 10 maize chromosomes (cM) on the x-axis. Dashes  
434 indicate a significant QTL, with the NAM RIL family in which the QTL was found designated  
435 by color; CML103 (black), CML333 (orange), Tx303 (grey), NC358 (blue). All dashes are the  
436 same length for visibility.

437

438 **Supplemental Figure 1 NAM RIL Transgressive Segregation.** NAM RIL families CML103  
439 (A), CML333 (B), NC358 (C), and Tx303 (D) were sorted by  $\delta^{13}\text{C}$  and plotted. Parental lines are  
440 shown in red.

441

442 **Supplemental Figure 2 Element and  $\delta^{13}\text{C}$  Full Correlation Matrix.** A full correlation matrix  
443 of element and  $\delta^{13}\text{C}$  mean values is show. The diagonal displays histograms of each dataset.  
444 Pearson's  $r$  is shown in the upper panel. Scatter plots and best fit line are shown in the lower  
445 panel.

446

447 **Supplemental Figure 3 Element QTL Mapping by Chromosome.** Significant element QTL  
448 are shown by maize chromosomes 1 through 10 on the x-axis (in cM). Each NAM RIL family is  
449 represented by a symbol; CML103 ( $\circ$ ), CML333 ( $\times$ ), NC358 ( $\square$ ), and Tx303 ( $\Delta$ ). Each element

450 is designated by color. Significance thresholds (dashed horizontal line) were determined using  
451 200 permutations, alpha=0.05 for each QTL independently.

452

453 **Supplemental Figure 4 Genome Wide Association Study for  $\delta^{13}\text{C}$ .** Manhattan plot showing  
454 significance of SNPs derived from a mixed linear model using the Bayesian information criterion  
455 to select the optimal number of principal components. The significance threshold represents the  
456 Bonferroni correction of familywise error rate.

## 457 **Literature Cited**

458 Adachi, S., K. Yoshikawa, U. Yamanouchi, T. Tanabata, J. Sun, T. *et al.*, 2017 Fine mapping of  
459 carbon assimilation rate 8, a quantitative trait locus for flag leaf nitrogen content, stomatal  
460 conductance and photosynthesis in rice. *Front. Plant Sci.*, 8: 60.

461

462 Asaro, A., G. Ziegler, C. Ziyomo, O. A. Hoekenga, B. P. Dilkes, B.P. and Baxter, I., 2016 The  
463 interaction of genotype and environment determines variation in the maize kernel ionome. *G3:*  
464 *Genes, Genomes, Genetics*, 6: 4175-4183.

465

466 Avramova, V., A. Meziane, E. Bauer, S. Blankenagel, S. Eggels *et al.*, 2019 Carbon isotope  
467 composition, water use efficiency, and drought sensitivity are controlled by a common genomic  
468 segment in maize. *Theor. Appl. Genet.* 132: 53-63.

469

470 Badeck, F., G. Tcherkez, S. Nogues, C. Piel, and J. Ghashghaie, 2005 Post-photosynthetic  
471 fractionation of stable carbon isotopes between plant organs—a widespread phenomenon. *Rapid*  
472 *Comm. Mass Spect.* 19: 1381-1391.

473

474 Barber, S.A. 1962 A diffusion and mass-flow concept of soil nutrient availability. *Soil Sci.* 93:  
475 39–49.

476

477 Barber, S. A., J. M. Walker, and E. Hi Vasey, 1963 Mechanisms for movement of plant nutrients  
478 from soil and fertilizer to plant root. *J. Agric. Food Chem.* 11: 204-207.

479

480 Barbour, M. M., C. R. Warren, G. D. Farquhar, G. Forrester, and H. Brown, 2010 Variability in  
481 mesophyll conductance between barley genotypes, and effects on transpiration efficiency and  
482 carbon isotope discrimination. *Plant Cell Environ.* 33: 1176-1185.

483

484 Baxter, I., B. Muthukumar, H. C. Park, P. Buchner, B. Lahner *et al.*, 2008 Variation in  
485 molybdenum content across broadly distributed populations of *Arabidopsis thaliana* is controlled  
486 by a mitochondrial molybdenum transporter (MOT1). *PLoS Genet.* 4: e1000004.

487

488 Baxter, I. R., G. Ziegler, B. Lahner, M. V. Mickelbart, R. Foley *et al.*, 2014 Single-kernel  
489 ionic profiles are highly heritable indicators of genetic and environmental influences on  
490 elemental accumulation in maize grain (*Zea mays*). PLoS ONE 9: e87628.  
491

492 Baxter, I. 2015 Should we treat the ionome as a combination of individual elements, or should  
493 we be deriving novel combined traits? J. Exp. Bot. 66: 2127-2131.  
494

495 Bazakos, C., Hanemian, M., Trontin, C., Jiménez-Gómez, J. M., and Loudet, O. 2017 New  
496 strategies and tools in quantitative genetics: how to go from the phenotype to the genotype. Ann.  
497 Rev. Plant Biol, 68: 435-455.  
498

499 Broman, K. W., H. Wu, S. Sen, and G. A. Churchill, 2003 R/qtl: QTL mapping in experimental  
500 crosses. Bioinformatics 19: 889-890.  
501

502 Bunce, J. A., 2010 Leaf transpiration efficiency of some drought-resistant maize lines. Crop Sci.  
503 50: 1409-1413.  
504

505 von Caemmerer, S., O. Ghannoum, J. J. L. Pengelly, and A. B. Cousins, 2014 Carbon isotope  
506 discrimination as a tool to explore C<sub>4</sub> photosynthesis. J. Exp. Bot. 65: 3459-3470.  
507

508 Cernusak, L. A., N. Ubierna, K. Winter, J. A. M. Holtum, J. D. Marshall *et al.*, 2013  
509 Environmental and physiological determinants of carbon isotope discrimination in terrestrial  
510 plants. New Phytol. 200: 950-965.  
511

512 Chapman, S. C., S. Chakraborty, M. F. Dreccer, and S. M. Howden, 2012 Plant adaptation to  
513 climate change—opportunities and priorities in breeding. Crop Pasture Sci. 63: 251-268.  
514

515 Chaves, M. M., J. S. Pereira, J. Maroco, M. L. Rodrigues, C. P. P. Ricardo *et al.*, 2002 How  
516 plants cope with water stress in the field? Photosynthesis and growth. Annals Bot. 89: 907-916.  
517

518 Chia, J., C. Song, P. J. Bradbury, D. Costich, N. De Leon *et al.*, 2012 Maize HapMap2 identifies  
519 extant variation from a genome in flux. *Nat. Genet.* 44: 803.

520

521 Condon, A. G., G. D. Farquhar, and R. A. Richards, 1990 Genotypic variation in carbon isotope  
522 discrimination and transpiration efficiency in wheat. Leaf gas exchange and whole plant studies.  
523 *Funct. Plant Biol.* 17: 9-22.

524

525 Condon, A. G., R. A. Richards, and G. D. Farquhar, 1993 Relationships between carbon isotope  
526 discrimination, water use efficiency and transpiration efficiency for dryland wheat. *Australian J.*  
527 *Agric. Res.* 44: 1693-1711.

528

529 Condon, A. G., R. A. Richards, G. J. Rebetzke, and G. D. Farquhar, 2004 Breeding for high  
530 water-use efficiency. *J. Exp. Bot.* 55: 2447-2460.

531

532 Ellsworth, P. Z., P. V. Ellsworth, and A. B. Cousins, 2017 Relationship of leaf oxygen and  
533 carbon isotopic composition with transpiration efficiency in the C<sub>4</sub> grasses *Setaria viridis* and  
534 *Setaria italica*. *J. Exp. Bot.* 68: 3513-3528.

535

536 Ellsworth, P., M. Feldman, I. Baxter, and A. Cousins, 2020 A genetic link between whole-plant  
537 water use efficiency and leaf carbon isotope composition in the C<sub>4</sub> grass *Setaria*. *Plant J.* [https://](https://doi.org/10.1111/tpj.14696)  
538 [doi.org/10.1111/tpj.14696](https://doi.org/10.1111/tpj.14696).

539

540 Farquhar, G. D., J. R. Ehleringer, and K. T. Hubick, 1989a Carbon isotope discrimination and  
541 photosynthesis. *Annu. Rev. Plant Biol.* 40: 503-537.

542

543 Farquhar, G. D., K. T. Hubick, A. G. Condon, and R. A. Richards, 1989b Carbon isotope  
544 fractionation and plant water-use efficiency, pp. 21-40 in *Stable isotopes in ecological research*,  
545 edited by P. W. Rundel, J. R. Ehleringer, and K. A. Nagy. Springer, New York.

546

547 Feldman, M. J., P. Z. Ellsworth, N. Fahlgren, M. A. Gehan, A. B. Cousins *et al.*, 2018  
548 Components of water use efficiency have unique genetic signatures in the model C<sub>4</sub> grass  
549 Setaria. *Plant Physiol.* 178: 699-715.  
550  
551 Flexas J., Díaz-Espejo A., Conesa M. A., Coopman R. E., Douthe C., *et al.* 2016 Mesophyll  
552 conductance to CO<sub>2</sub> and Rubisco as targets for improving intrinsic water use efficiency in C<sub>3</sub>  
553 plants. *Plant, Cell & Environment.* 39: 965-82.  
554  
555 Gresset, S., P. Westermeier, S. Rademacher, M. Ouzunova, T. Presterl *et al.*, 2014 Stable carbon  
556 isotope discrimination is under genetic control in the C<sub>4</sub> species maize with several genomic  
557 regions influencing trait expression. *Plant Physiol.* 164: 131-143.  
558  
559 Hirsch, C. N., J. M. Foerster, J. M. Johnson, R. S. Sekhon, G. Muttoni *et al.* 2014 Insights into  
560 the maize pan-genome and pan-transcriptome. *Plant Cell* 26: 121-135.  
561  
562 Hammer, G. L., G. D. Farquhar, and I. J. Broad, 1997 On the extent of genetic variation for  
563 transpiration efficiency in sorghum. *Australian J. Agric. Res.* 48: 649-656.  
564  
565 Hansey, C. N., J. M. Johnson, R. S. Sekhon, S. M. Kaeppler, and N. de Leon, 2011 Genetic  
566 diversity of a maize association population with restricted phenology. *Crop Sci.* 51: 704-715.  
567  
568 Henderson, S., S. Von Caemmerer, G. D. Farquhar, L. Wade, and G. Hammer, 1998 Correlation  
569 between carbon isotope discrimination and transpiration efficiency in lines of the C<sub>4</sub> species  
570 *Sorghum bicolor* in the glasshouse and the field. *Funct. Plant Biol.* 25: 111-123.  
571  
572 Holm, S., 1979 A simple sequentially rejective multiple test procedure. *Scandinavian J. Stat.* 6:  
573 65-70.  
574  
575 Jaleel, C. A.I, P. Manivannan, A. Wahid, M. Farooq, H. J Al-Juburi *et al.* 2009 Drought stress in  
576 plants: a review on morphological characteristics and pigments composition. *Int. J. Agric. Biol.*  
577 11: 100-105.

578  
579 Keeling, C. D., W. G. Mook, and P. P. Tans 1979 Recent trends in the  $^{13}\text{C}/^{12}\text{C}$  ratio of  
580 atmospheric carbon dioxide. *Nature* 277: 121-123.  
581  
582 Kolbe, A. R., T. P. Brutnell, A. B. Cousins, A. J. Studer, 2018a. Carbonic anhydrase mutants in  
583 *Zea mays* have altered stomatal responses to environmental signals. *Plant Physiol.*, 177: 980-989.  
584  
585 Kolbe, A. R., A. J. Studer, and A. B. Cousins, 2018b Biochemical and transcriptomic analysis of  
586 maize diversity to elucidate drivers of leaf carbon isotope composition. *Funct. Plant Biol.* 45:  
587 489-500.  
588  
589 Leakey, A. D. B., J. N. Ferguson, C. P. Pignon, A. Wu, Z. Jin *et al.* 2019 Water use efficiency as  
590 a constraint and target for improving the resilience and productivity of  $\text{C}_3$  and  $\text{C}_4$  crops. *Annu.*  
591 *Rev. Plant Biol.* 70: 781-808.  
592  
593 Li, H., Thrash, A., Tang, J. D., He, L., Yan, J., and Warburton, M. L. 2019 Leveraging GWAS  
594 data to identify metabolic pathways and networks involved in maize lipid biosynthesis. *Plant J.*,  
595 98: 853-863.  
596  
597 Lipka, A. E., F. Tian, Q. Wang, J. Peiffer, M. Li *et al.* 2012 GAPIT: genome association and  
598 prediction integrated tool. *Bioinformatics* 28: 2397-2399.  
599  
600 Lipka, A. E., C. B. Kandianis, M. E. Hudson, J. Yu, J. Drnevich *et al.* 2015 From association to  
601 prediction: statistical methods for the dissection and selection of complex traits in plants. *Curr.*  
602 *Opin. Plant Biol.* 24: 110-118.  
603  
604 Lu, Y., Y. Li, J. Zhang, Y. Xiao, Y. Yue *et al.* 2013 Overexpression of *Arabidopsis* molybdenum  
605 cofactor sulfurase gene confers drought tolerance in maize (*Zea mays* L.). *PLoS ONE* 8: e52126.  
606  
607 Marschner, H., and B. Dell, 1994 Nutrient uptake in mycorrhizal symbiosis. *Plant Soil* 159: 89-  
608 102.

609

610 Masle, J., G. D. Farquhar, and S. C. Wong, 1992 Transpiration ratio and plant mineral content  
611 are related among genotypes of a range of species. *Funct. Plant Biol.* 19: 709-721.

612

613 Masle, J., Gilmore, S. R., and Farquhar, G. D., 2005. The ERECTA gene regulates plant  
614 transpiration efficiency in *Arabidopsis*. *Nature*, 436: 866.-870

615

616 McGrath, J. M., and Lobell, D. B. 2013 Reduction of transpiration and altered nutrient allocation  
617 contribute to nutrient decline of crops grown in elevated CO<sub>2</sub> concentrations. *Plant, Cell &*  
618 *Environment*, 36: 697-705.

619

620 McMullen, M. D., S. Kresovich, H. S. Villeda, P. Bradbury, H. Li *et al.* 2009 Genetic properties  
621 of the maize nested association mapping population. *Science* 325: 737-740.

622

623 Myers, S. S., Zanobetti, A., Kloog, I., Huybers, P., Leakey, A. D., *et al.* 2014 Increasing CO<sub>2</sub>  
624 threatens human nutrition. *Nature*, 510: 139-142.

625

626 National Academies of Sciences, Engineering, and Medicine. 2019 Science Breakthroughs  
627 to Advance Food and Agricultural Research by 2030. Washington, DC: Natl.  
628 Acad. Press.

629

630 O'Leary, M. H., 1988 Carbon isotopes in photosynthesis. *Bioscience* 38: 328-336.

631

632 Passioura, J. B., 1996 Drought and drought tolerance. *Plant Growth Reg.* 20: 79-83.

633

634 Pauli, D., G. Ziegler, M. Ren, M. A. Jenks, D. J. Hunsaker, *et al.* 2018 Multivariate analysis of  
635 the cotton seed ionome reveals a shared genetic architecture. *G3: Genes, Genomes, Genetics*, 8:  
636 1147-1160.

637

638 Purcell, L. C., J. T. Edwards, and K. R. Brye, 2007 Soybean yield and biomass responses to  
639 cumulative transpiration: Questioning widely held beliefs. *Field Crops Res.* 101: 10-18.



640

641 R Core Team 2017 R: A language and environment for statistical computing. R Foundation for  
642 Statistical Computing, Vienna, Austria. Available at: <https://www.R-project.org/>.

643

644 Rebetzke, G. J., A. G. Condon, G. D. Farquhar, R. Appels, and R. A. Richards, 2008  
645 Quantitative trait loci for carbon isotope discrimination are repeatable across environments and  
646 wheat mapping populations. *Theor. Appl. Genet.* 118: 123-137.

647

648 Revelle, W. R., 2017 psych: Procedures for personality and psychological research. Software,  
649 <https://CRAN.R-project.org/package=psych>, version 1.8.4.

650

651 Sheffield, J., and E. F. Wood 2008 Projected changes in drought occurrence under future global  
652 warming from multi-model, multi-scenario, IPCC AR4 simulations. *Climate Dynamics* 31: 79-  
653 105.

654

655 Shiferaw, B., B. M. Prasanna, J. Hellin, and M. Bänziger, 2011 Crops that feed the world 6. Past  
656 successes and future challenges to the role played by maize in global food security. *Food Sec.* 3:  
657 307.

658

659 Tian, F., P. J. Bradbury, P. J. Brown, H. Hung, Q. Sun *et al.* 2011 Genome-wide association  
660 study of leaf architecture in the maize nested association mapping population. *Nature Genet.* 43:  
661 159.

662

663 Teulat, B., O. Merah, X. Sirault, C. Borries, R. Waugh *et al.* 2002 QTLs for grain carbon isotope  
664 discrimination in field-grown barley. *Theor. Appl. Genet.* 106: 118-126.

665

666 This, D., J. Comstock, B. Courtois, Y. Xu, N. Ahmadi *et al.* 2010 Genetic analysis of water use  
667 efficiency in rice (*Oryza sativa* L.) at the leaf level. *Rice* 3: 72.

668

669 Twohey III, R J., L. M. Roberts, and A. J. Studer 2019 Leaf stable carbon isotope composition  
670 reflects transpiration efficiency in *Zea mays*. *Plant J.* 97: 475-484.

671  
672 Virgona, J. M., K. T. Hubick, H. M. Rawson, G. D. Farquhar, and R. W. Downes, 1990  
673 Genotypic variation in transpiration efficiency, carbon-isotope discrimination and carbon  
674 allocation during early growth in sunflower. *Funct. Plant Biol.* 17: 207-214.  
675  
676 Walker, G. K., 1986 Transpiration efficiency of field-grown maize. *Field Crops Res.* 14: 29-38.  
677  
678 Wallace, J. G., S. J. Larsson, and E. S. Buckler, 2014 Entering the second century of maize  
679 quantitative genetics. *Heredity* 112: 30.  
680  
681 Xu, Y., D. This, R. C. Pausch, W. M. Vonhof, J. R. Coburn *et al.* 2009 Leaf-level water use  
682 efficiency determined by carbon isotope discrimination in rice seedlings: genetic variation  
683 associated with population structure and QTL mapping. *Theor. Appl. Genet.* 118: 1065-1081.  
684  
685 Yu, J., and E. S. Buckler, 2006 Genetic association mapping and genome organization of maize.  
686 *Curr. Opin. Biotechnol.* 17: 155-160.  
687  
688 Zhao, W., P. Canaran, R. Jurkuta, T. Fulton, J. Glaubitz *et al.* 2006 Panzea: a database and  
689 resource for molecular and functional diversity in the maize genome. *Nucleic Acids Res.* 34:  
690 D752-D757.

Figure 1:

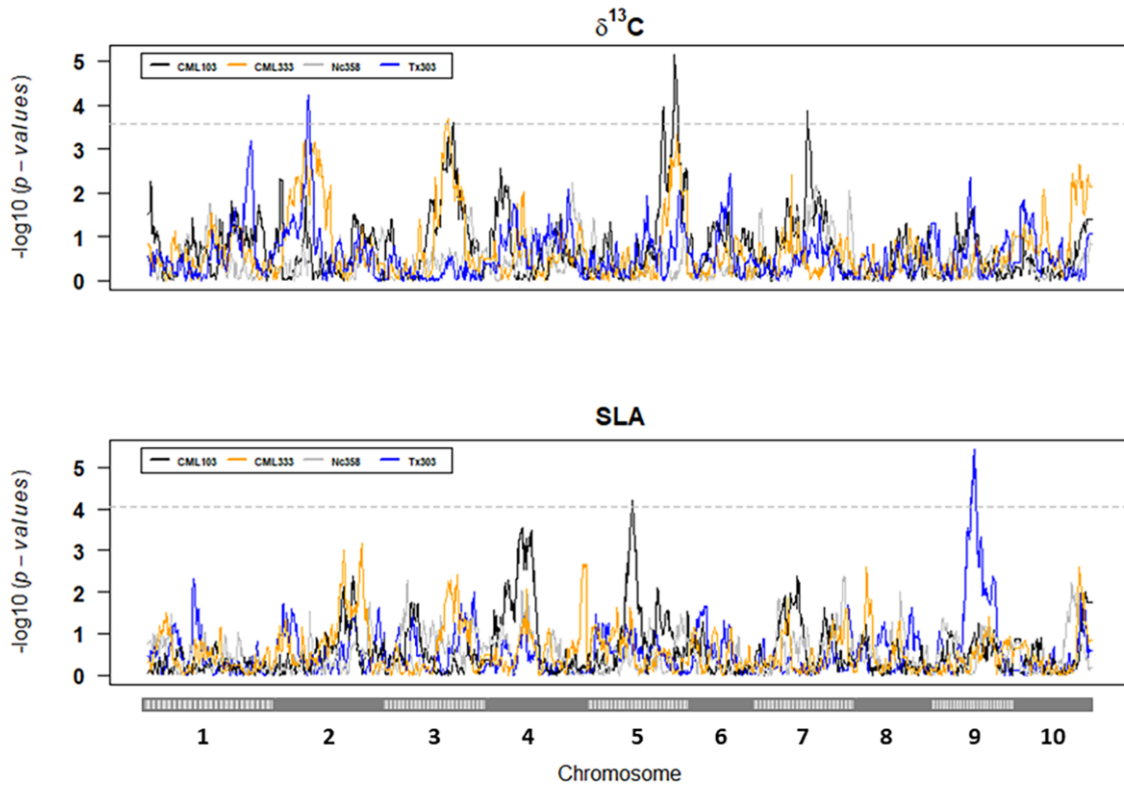

**Figure 1**  $\delta^{13}\text{C}$  and SLA Single Family Stepwise Regression QTL Mapping.  $\delta^{13}\text{C}$  QTL (**A**) were identified in NAM RIL families CML103 (black), CML333 (orange), and Tx303 (grey) but not in NC358 (blue). Specific leaf area (SLA) QTL (**B**) were identified in NAM RIL families CML103 (black) and Tx303 (grey). Significance thresholds (dashed horizontal line) were determined by 200 permutations and an alpha of 0.05.

Figure 2:

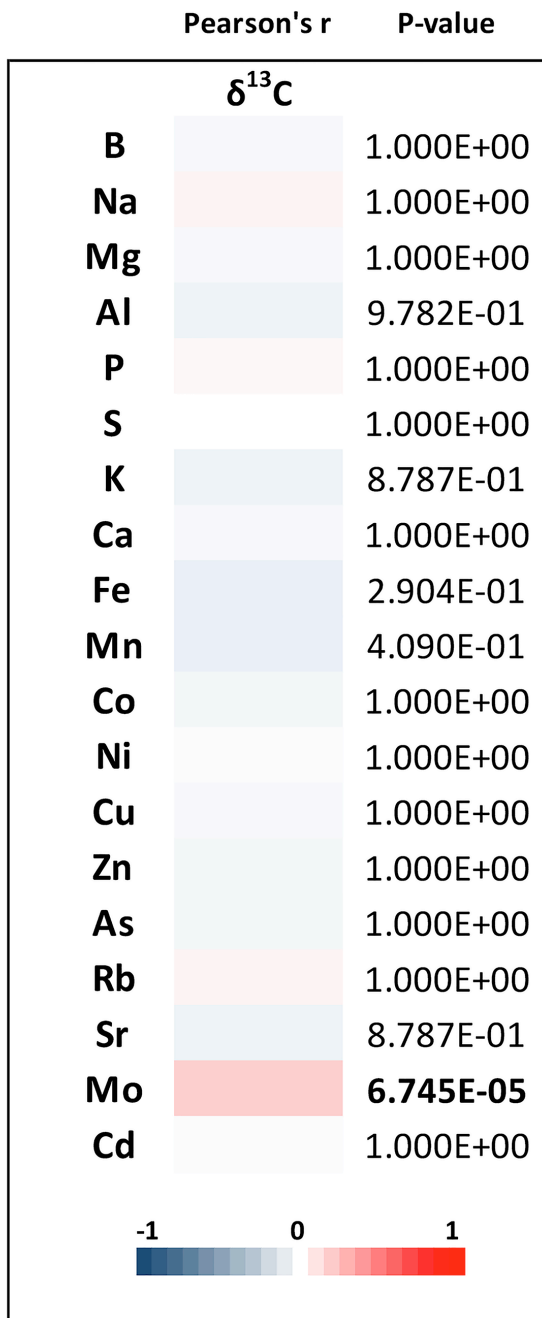

**Figure 2 Pearson's r Correlations.** Correlations of mean phenotypic values using complete observations and Holm's method to adjust  $p$ -values for multiple testing. The heat map shows no strong correlations between  $\delta^{13}\text{C}$  mean values and element mean values.  $\delta^{13}\text{C}$  and Mo have a significant  $p$ -value ( $p = 6.745\text{E-}05$ ,  $r = 0.18$ ).

Figure 3:

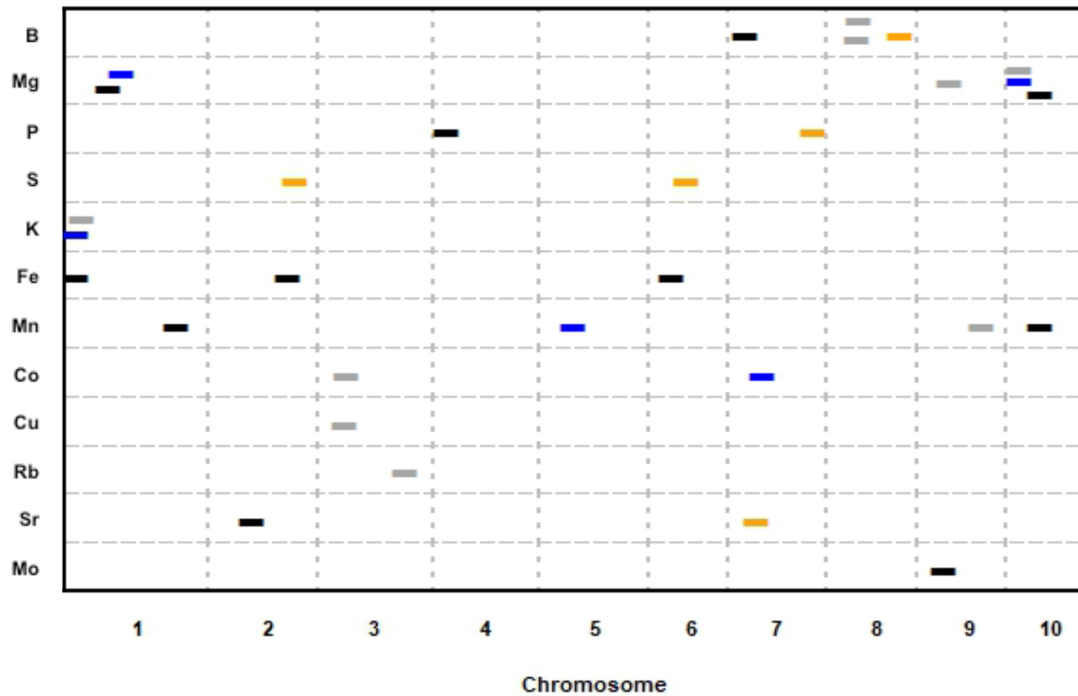

**Figure 3 Element Single Family Stepwise Regression QTL Mapping.** QTL mapping identified 28 QTL across 12 different elements. Significant QTL ( $\alpha = 0.05$ ) for each element are plotted. QTL location is shown across the 10 maize chromosomes (cM) on the x-axis. Dashes indicate a significant QTL, with the NAM RIL family in which the QTL was found designated by color; CML103 (black), CML333 (orange), Tx303 (grey), NC358 (blue). All dashes are the same length for visibility.

## Figure S1:

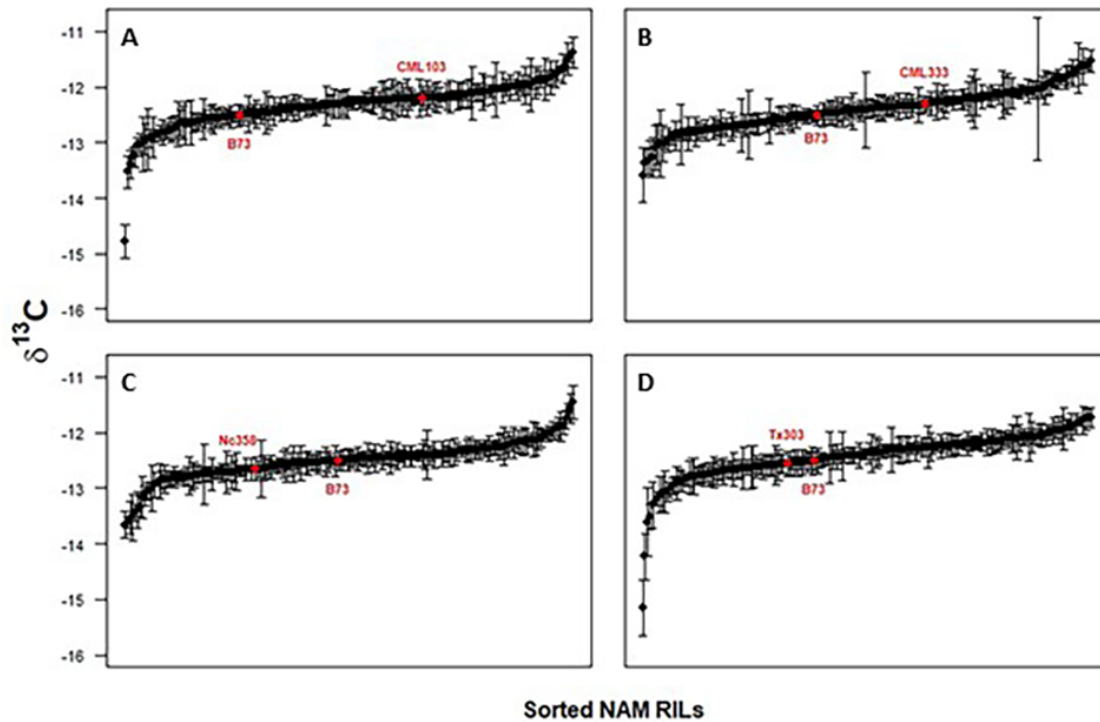

**Supplemental Figure 1 NAM RIL Transgressive Segregation.** NAM RIL families CML103 (A), CML333 (B), NC358 (C), and Tx303 (D) were sorted by  $\delta^{13}\text{C}$  and plotted. Parental lines are shown in red.

## Figure S2:

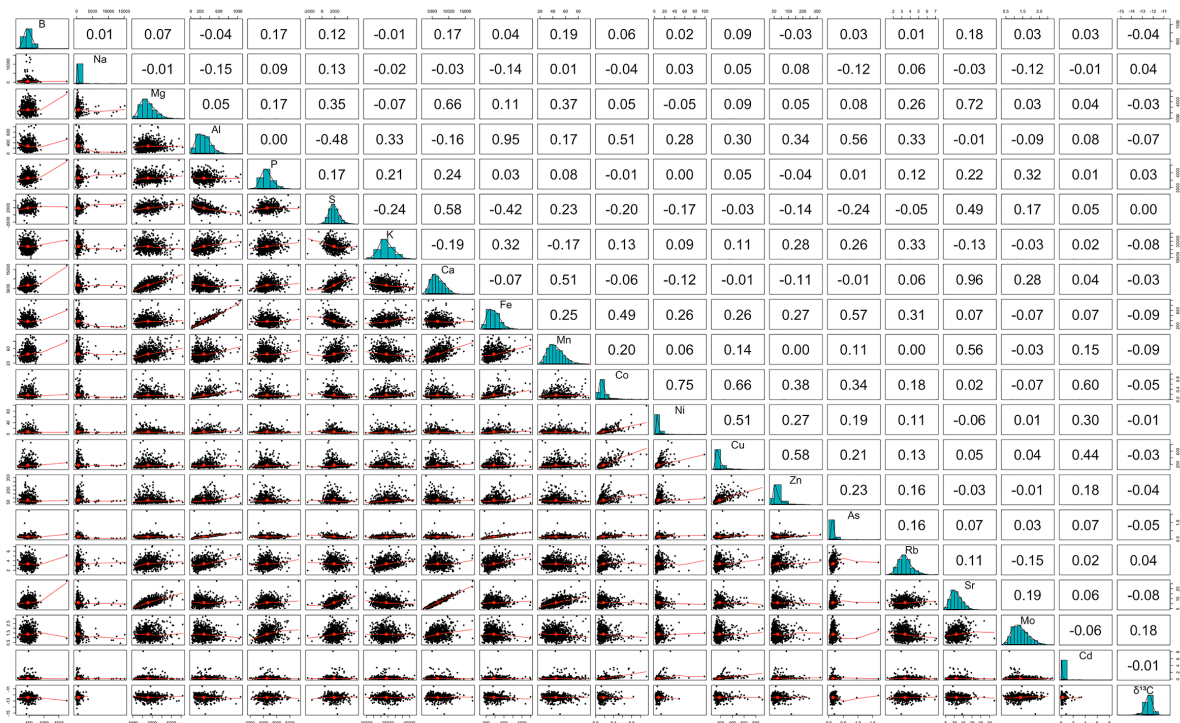

**Supplemental Figure 2 Element and  $\delta^{13}\text{C}$  Full Correlation Matrix.** A full correlation matrix of element and  $\delta^{13}\text{C}$  mean values is shown. The diagonal displays histograms of each dataset. Pearson's  $r$  is shown in the upper panel. Scatter plots and best fit line are shown in the lower panel.

Figure S3:

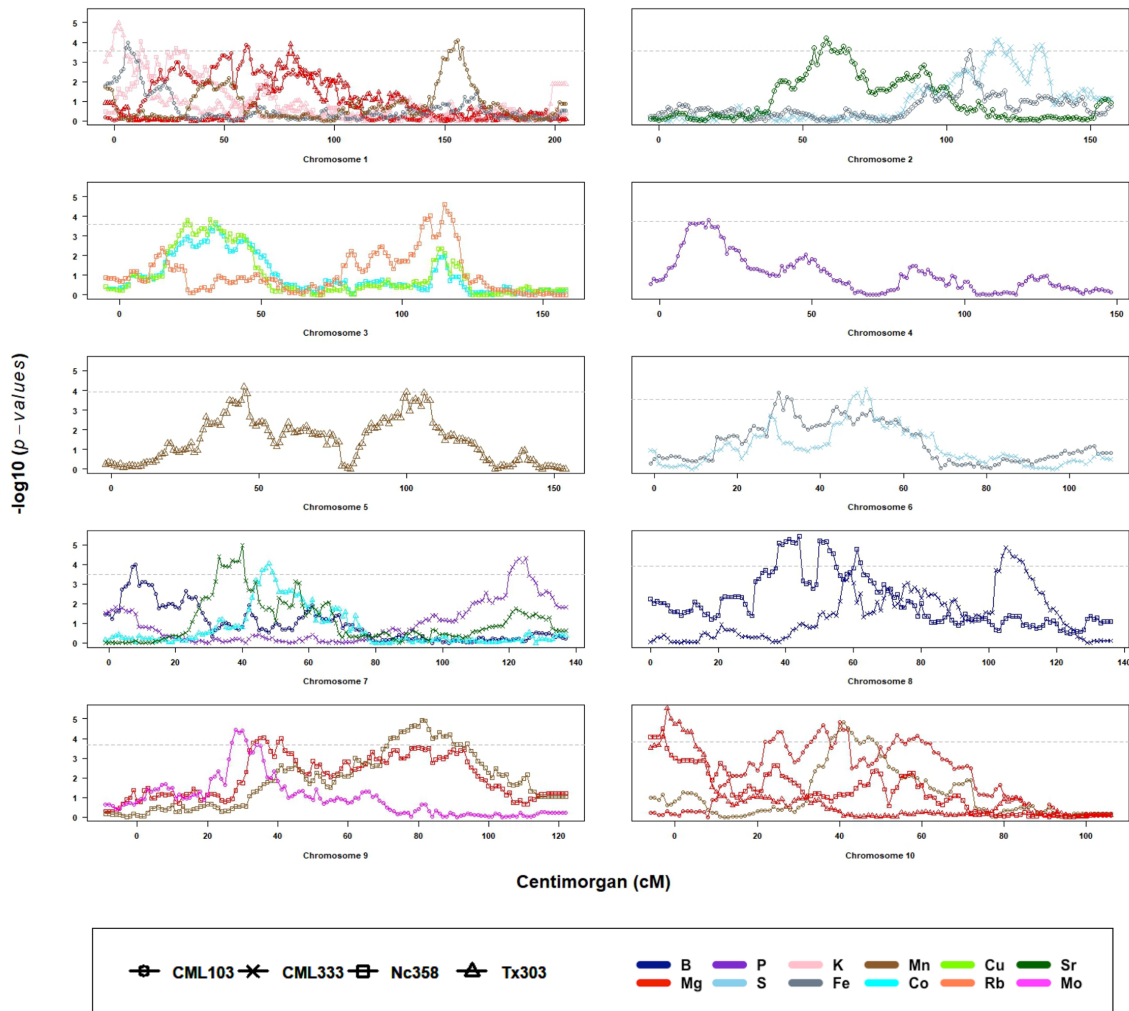

**Supplemental Figure 3 Element QTL Mapping by Chromosome.** Significant element QTL are shown by maize chromosomes 1 through 10 on the x-axis (in cM). Each NAM RIL family is represented by a symbol; CML103 (○), CML333 (×), NC358 (□), and Tx303 (△). Each element is designated by color. Significance thresholds (dashed horizontal line) were determined using 200 permutations,  $\alpha=0.05$  for each QTL independently.



Figure S4:

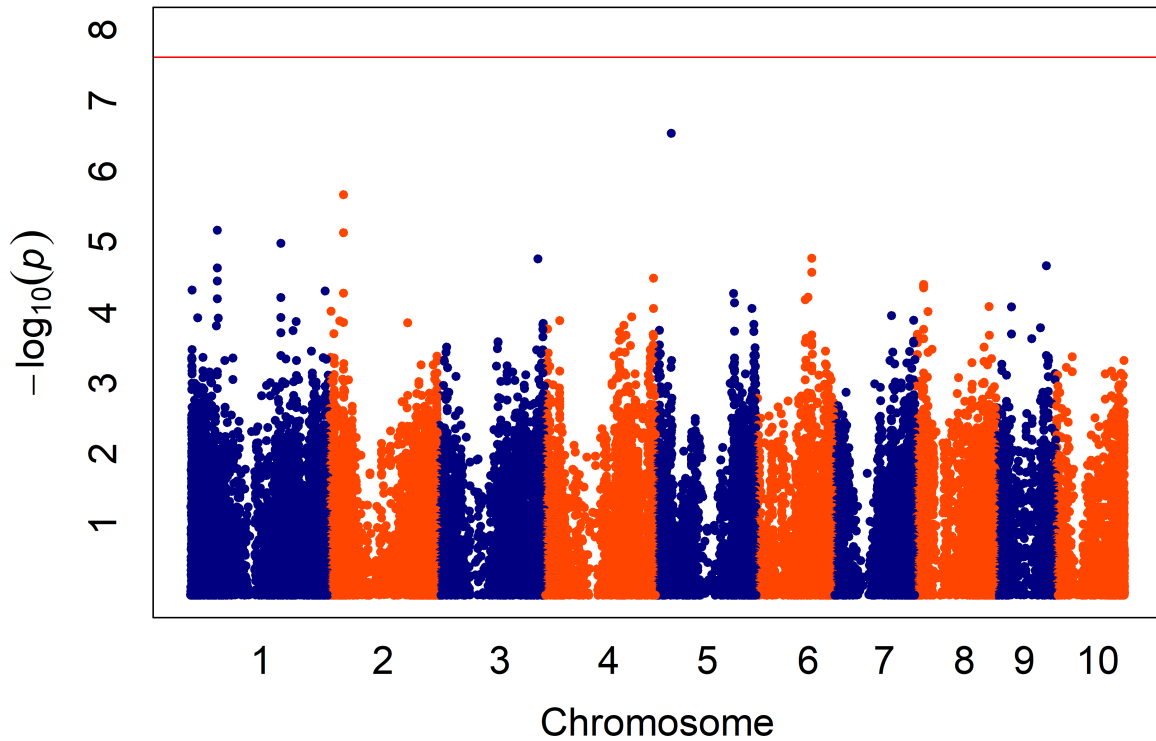

**Supplemental Figure 3 Element QTL Mapping by Chromosome.** Significant element QTL are shown by maize chromosomes 1 through 10 on the x-axis (in cM). Each NAM RIL family is represented by a symbol; CML103 ( $\circ$ ), CML333 ( $\times$ ), NC358 ( $\square$ ), and Tx303 ( $\Delta$ ). Each element is designated by color. Significance thresholds (dashed horizontal line) were determined using 200 permutations,  $\alpha=0.05$  for each QTL independently.
